# Supplementary material
Source: publisher site journal article supplement (https://www.dovepress.com/article/349519)
Supplement: Supplementary file 1 [file get_supplementary_file.php]

# Supplementary File 1. Search strategies

## CENTRAL (date of last search: August 31, 2021)

| **No.** | **Searches** | **Results** |
| --- | --- | --- |
| **Part 1: Children and adolescents** | | |
| 1 | MeSH descriptor: [Child] explode all trees | 58448 |
| 2 | MeSH descriptor: [Adolescent] this term only | 106993 |
| 3 | MeSH descriptor: [Pediatrics] this term only | 658 |
| 4 | (child* or adolescen* or p?ediatric* or teen* or preteen* or pre-teen* or youth* or pubescen* or juvenil* or boy* or girl* or minor? or kid? or underage? or under age?):ti,ab | 224862 |
| 5 | #1 or #2 or #3 or #4 | 306757 |
| **Part 2: Congenital heart disease** | | |
| 6 | MeSH descriptor: [Heart Defects, Congenital] explode all trees | 2318 |
| 7 | (((heart or cardiac) near/2 (defect* or abnormal* or anomal* or malform*)) or (congenital near/2 (heart or cardiac or cardio* or defect*))):ti,ab | 2917 |
| 8 | ((aort* near/2 coarctation) or (septal near/2 defect*) or (septum near/2 defect*) or (patent next ductus next arteriosus) or (transposition near/2 arteries) or (transposition near/2 vessels) or guch or (fallot* near/2 tetralogy)):ti,ab | 1545 |
| 9 | #6 or #7 or #8 | 5390 |
| **Part 3: Digital health** | | |
| 10 | MeSH descriptor: [Cell Phone] explode all trees | 1992 |
| 11 | MeSH descriptor: [Computers, Handheld] explode all trees | 831 |
| 12 | MeSH descriptor: [Telemedicine] this term only | 2444 |
| 13 | MeSH descriptor: [Telenursing] this term only | 31 |
| 14 | MeSH descriptor: [Electronic Mail] this term only | 345 |
| 15 | MeSH descriptor: [Mobile Applications] explode all trees | 888 |
| 16 | MeSH descriptor: [Medical Informatics] this term only | 80 |
| 17 | MeSH descriptor: [Medical Informatics Applications] this term only | 23 |
| 18 | MeSH descriptor: [Nursing Informatics] this term only | 7 |
| 19 | MeSH descriptor: [Public Health Informatics] this term only | 2 |
| 20 | MeSH descriptor: [Social Media] this term only | 203 |
| 21 | (cell* or mobile*) near/1 (phone* or telephone* or technolog* or device*) | 5323 |
| 22 | smartphone? or smart phone? or smart-phone? or cellphone? or mobiles | 5848 |
| 23 | (personal near/1 digital) or (PDA near/3 (computer* or device* or assistant*)) or (tablet* near/3 (device* or computer*)) or (hand* near/1 computer*) or palmtop or palm PC | 1682 |
| 24 | (windows near/3 (mobile* or phone*)) or android or ipad* or i-pad* or iphone* or i-phone* | 1808 |
| 25 | mhealth or m-health or "mobile health" or ehealth or e-health or "electronic health" | 6159 |
| 26 | telemedicine or tele-medicine or telehealth or tele-health or telecare or tele-care or telenursing or tele-nursing or telemonitor* or tele-monitor* or teleconsult* or tele-consult* or telecounsel* or tele-counsel* or telecoach* or tele-coach* | 7954 |
| 27 | ((text* or short or voice or multimedia or multi-media or electronic or instant) near/1 messag*) or instant messenger | 4887 |
| 28 | texting or texted or texter* or ((sms or mms) near/1 (service* or messag*)) or (remind* near/3 (text* or system* or messag*)) or interactive voice response* or IVR or voice call* or callback* or voice over internet or VOIP | 5192 |
| 29 | electronic mail* or email* or e-mail or webmail | 1819432 |
| 30 | "mobile app?" or Facebook or Twitter or Whatsapp* or Skyp* or YouTube or "You Tube" or Google Hangout* or Wechat* or "Wei Xin" or (social near/1 (media or network*)) | 5637 |
| 31 | (medical or clinical or health or healthcare or nurs*) near/3 informatics | 1900 |
| 32 | #10 or #11 or #12 or #13 or #14 or #15 or #16 or #17 or #18 or #19 or #20 or #21 or #22 or #23 or #24 or #25 or #26 or #27 or #28 or #29 or #30 or #31 | 1819447 |
| **Part 4: Exercise-based cardiac rehabilitation** | | |
| 33 | MeSH descriptor: [Rehabilitation] explode all trees | 38197 |
| 34 | MeSH descriptor: [Exercise] explode all trees | 26442 |
| 35 | MeSH descriptor: [Recreation] explode all trees | 17784 |
| 36 | MeSH descriptor: [Physical Exertion] this term only | 3925 |
| 37 | MeSH descriptor: [Physical Fitness] explode all trees | 3538 |
| 38 | MeSH descriptor: [Psychotherapy] explode all trees | 25344 |
| 39 | MeSH descriptor: [Self Care] explode all trees | 5870 |
| 40 | MeSH descriptor: [Counseling] explode all trees | 5721 |
| 41 | MeSH descriptor: [Health Education] this term only | 4073 |
| 42 | MeSH descriptor: [Patient Education as Topic] this term only | 9101 |
| 43 | MeSH descriptor: [Physical Education and Training] this term only | 1621 |
| 44 | rehabilitat* or telerehabilitat* or tele-rehabilitat* or (train* near/5 (strength* or aerobic* or exercise*)) or ((exercise* or fitness) near/3 (treatment or intervent* or program*)) or recreation* | 104639 |
| 45 | (physical* near/5 (fit* or train* or therap* or activit*)) or kinesiotherap* or psychotherap* or (psycholog* near/5 intervent*) | 89099 |
| 46 | (self near/5 (manag* or care or motivate*)) or ((lifestyle or life-style) near/5 (interven* or program* or treatment*)) or ((behavior* or behaviour*) near/5 (modify or modificat* or therap* or change)) or (patient* near/5 educat*) or (counselling or counseling) or (psycho-educat* or psychoeducat*) or (motivat* near/5 (intervention or interv*)) or (health near/5 educat*) or (psychosocial or psycho-social) or (cognitive near/2 behav*) | 134168 |
| 47 | #33 or #34 or #35 or #36 or #37 or #38 or #39 or #40 or #41 or #42 or #43 or #44 or #45 or #46 | 283647 |
| 48 | #5 and #9 and #32 and #47 | 273 |

## MEDLINE Ovid (date of last search: August 31, 2021)

| **No.** | **Searches** | **Results** |
| --- | --- | --- |
| **Part 1: Children and adolescents** | | |
| 1 | exp Child/ or Adolescent/ or Pediatrics/ | 3183316 |
| 2 | (child$ or adolescen$ or p?ediatric$ or teen$ or preteen$ or pre-teen$ or youth$ or pubescen$ or juvenil$ or boy$ or girl$ or minor? or kid? or underage? or under age?).ti,ab. | 1985591 |
| 3 | 1 or 2 | 3784976 |
| **Part 2: Congenital heart disease** | | |
| 4 | exp Heart Defects, Congenital/ or exp Heart Diseases/cn [Congenital] | 163439 |
| 5 | (((heart or cardiac) adj2 (defect$ or abnormal$ or anomal$ or malform$)) or (congenital adj2 (heart or cardiac or cardio$ or defect$))).ti,ab. | 65573 |
| 6 | ((aort$ adj2 coarctation) or (septal adj2 defect$) or (septum adj2 defect$) or (patent next ductus next arteriosus) or (transposition adj2 arteries) or (transposition adj2 vessels) or guch or (fallot$ adj2 tetralogy)).ti,ab. | 34375 |
| 7 | or/4-6 | 195005 |
| **Part 3: Digital health** | | |
| 8 | Cell Phone/ or Smartphone/ or Computers, Handheld/ or Telemedicine/ or Telenursing/ or Text Messaging/ or E-mail/ or Mobile Applications/ or Medical Informatics/ or Medical Informatics Applications/ or Nursing Informatics/ or Public Health Informatics/ or Social Media/ | 81333 |
| 9 | ((cell$ or mobile$) adj1 (phone$ or telephone$ or technolog$ or device$)).mp. | 19916 |
| 10 | (smartphone? or smart phone? or smart-phone? or cellphone? or mobiles).mp. | 12765 |
| 11 | ((personal adj1 digital) or (PDA adj3 (computer$ or device$ or assistant$)) or (tablet$ adj3 (device$ or computer$)) or (hand$ adj1 computer$) or palmtop or palm PC).mp. | 5862 |
| 12 | ((windows adj3 (mobile$ or phone$)) or android or ipad$ or i-pad$ or iphone$ or i-phone$).mp. | 4099 |
| 13 | (mhealth or m-health or "mobile health" or ehealth or e-health or "electronic health").mp. | 45161 |
| 14 | (telemedicine or tele-medicine or telehealth or tele-health or telecare or tele-care or telenursing or tele-nursing or telemonitor$ or tele-monitor$ or teleconsult$ or tele-consult$ or telecounsel$ or tele-counsel$ or telecoach$ or tele-coach$).mp. | 36084 |
| 15 | (((text$ or short or voice or multimedia or multi-media or electronic or instant) adj1 messag$) or instant messenger).mp. | 6153 |
| 16 | (texting or texted or texter$ or ((sms or mms) adj (service$ or messag$)) or (remind$ adj3 (text$ or system$ or messag$)) or interactive voice response$ or IVR or voice call$ or callback$ or voice over internet or VOIP).mp. | 7586 |
| 17 | (electronic mail$ or email$ or e-mail or webmail).mp. | 15317 |
| 18 | ("mobile app?" or Facebook or Twitter or Whatsapp$ or Skyp$ or YouTube or "You Tube" or Google Hangout$ or Wechat$ or "Wei Xin" or (social adj (media or network$))).mp. | 36070 |
| 19 | ((medical or clinical or health or healthcare or nurs$) adj3 informatics).mp. | 21432 |
| 20 | or/8-19 | 172523 |
| **Part 4: Exercise-based cardiac rehabilitation** | | |
| 21 | exp Rehabilitation/ or Telerehabilitation/ or exp Exercise/ or exp Exercise Therapy/ or Recreation Therapy/ or exp Recreation/ | 515650 |
| 22 | Physical Exertion/ or exp Physical Fitness/ or exp Psychotherapy/ or exp Self Care/ or Counseling/ or Health Education/ or Patient Education as Topic/ or exp "Physical Education and Training" | 489979 |
| 23 | (rehabilitat$ or telerehabilitat$ or tele-rehabilitat$ or (train$ adj5 (strength$ or aerobic$ or exercise$)) or ((exercise$ or fitness) adj3 (treatment or intervent$ or program$)) or recreation$).mp. | 388479 |
| 24 | ((physical$ adj5 (fit$ or train$ or therap$ or activit$)) or kinesiotherap$ or psychotherap$ or (psycholog$ adj5 intervent$)).mp. | 305541 |
| 25 | ((self adj5 (manag$ or care or motivate$)) or ((lifestyle or life-style) adj5 (interven$ or program$ or treatment$)) or ((behavior$ or behaviour$) adj5 (modify or modificat$ or therap$ or change)) or (patient$ adj5 educat$) or (counselling or counseling) or (psycho-educat$ or psychoeducat$) or (motivat$ adj5 (intervention or interv$)) or (health adj5 educat$) or (psychosocial or psycho-social) or (cognitive adj2 behav$)).mp. | 588978 |
| 26 | or/21-25 | 1268293 |
| 27 | 3 and 7 and 20 and 26 | 36 |

## **Embase O**vid (date of last search: August 31, 2021)

| **No.** | **Searches** | **Results** |
| --- | --- | --- |
| **Part 1: Children and adolescents** | | |
| 1 | exp Child/ or Adolescent/ or Pediatrics/ | 3608310 |
| 2 | (child$ or adolescen$ or p?ediatric$ or teen$ or preteen$ or pre-teen$ or youth$ or pubescen$ or juvenil$ or boy$ or girl$ or minor? or kid? or underage? or under age?).ti,ab. | 2847549 |
| 3 | 1 or 2 | 4559351 |
| **Part 2: Congenital heart disease** | | |
| 4 | exp Congenital Heart Malformation/ or exp Congenital Heart Disease/ or exp Heart Disease/cn [Congenital Disorder] | 182290 |
| 5 | (((heart or cardiac) adj2 (defect$ or abnormal$ or anomal$ or malform$)) or (congenital adj2 (heart or cardiac or cardio$ or defect$))).ti,ab. | 101478 |
| 6 | ((aort$ adj2 coarctation) or (septal adj2 defect$) or (septum adj2 defect$) or (patent next ductus next arteriosus) or (transposition adj2 arteries) or (transposition adj2 vessels) or guch or (fallot$ adj2 tetralogy)).ti,ab. | 48156 |
| 7 | or/4-6 | 227324 |
| **Part 3: Digital health** | | |
| 8 | Smartphone/ or Mobile phone/ or Personal Digital Assistant/ or Telemedicine/ or Telenursing/ or Text Messaging/ or E-Mail/ or Mobile Application/ or Medical informatics/ or Medical informatics applications/ or Nursing informatics/ or Public health informatics/ or Social Media/ | 150068 |
| 9 | ((cell$ or mobile$) adj1 (phone$ or telephone$ or technolog$ or device$)).mp. | 36458 |
| 10 | (smartphone? or smart phone? or smart-phone? or cellphone? or mobiles).mp. | 27062 |
| 11 | ((personal adj1 digital) or (PDA adj3 (computer$ or device$ or assistant$)) or (tablet$ adj3 (device$ or computer$)) or (hand$ adj1 computer$) or palmtop or palm PC).mp. | 7911 |
| 12 | ((windows adj3 (mobile$ or phone$)) or android or ipad$ or i-pad$ or iphone$ or i-phone$).mp. | 10182 |
| 13 | (mhealth or m-health or "mobile health" or ehealth or e-health or "electronic health").mp. | 56890 |
| 14 | (telemedicine or tele-medicine or telehealth or tele-health or telecare or tele-care or telenursing or tele-nursing or telemonitor$ or tele-monitor$ or teleconsult$ or tele-consult$ or telecounsel$ or tele-counsel$ or telecoach$ or tele-coach$).mp. | 63402 |
| 15 | (((text$ or short or voice or multimedia or multi-media or electronic or instant) adj1 messag$) or instant messenger).mp. | 10925 |
| 16 | (texting or texted or texter$ or ((sms or mms) adj (service$ or messag$)) or (remind$ adj3 (text$ or system$ or messag$)) or interactive voice response$ or IVR or voice call$ or callback$ or voice over internet or VOIP).mp. | 10670 |
| 17 | (electronic mail$ or email$ or e-mail or webmail).mp. | 42376 |
| 18 | ("mobile app?" or Facebook or Twitter or Whatsapp$ or Skyp$ or YouTube or "You Tube" or Google Hangout$ or Wechat$ or "Wei Xin" or (social adj (media or network$))).mp. | 71018 |
| 19 | ((medical or clinical or health or healthcare or nurs$) adj3 informatics).mp. | 28164 |
| 20 | or/8-19 | 301365 |
| **Part 4: Exercise-based cardiac rehabilitation** | | |
| 21 | exp Rehabilitation/ or Telerehabilitation/ or exp Exercise/ or exp kinesiotherapy/ or Recreation Therapy/ or exp Recreation/ | 865250 |
| 22 | Fitness/ or exp Psychotherapy/ or Self Care/ or exp Counseling/ or Health Education/ or Patient Education/ or exp Physical Education | 715402 |
| 23 | (rehabilitat$ or telerehabilitat$ or tele-rehabilitat$ or (train$ adj5 (strength$ or aerobic$ or exercise$)) or ((exercise$ or fitness) adj3 (treatment or intervent$ or program$)) or recreation$).mp. | 523317 |
| 24 | ((physical$ adj5 (fit$ or train$ or therap$ or activit$)) or kinesiotherap$ or psychotherap$ or (psycholog$ adj5 intervent$)).mp. | 472289 |
| 25 | ((self adj5 (manag$ or care or motivate$)) or ((lifestyle or life-style) adj5 (interven$ or program$ or treatment$)) or ((behavior$ or behaviour$) adj5 (modify or modificat$ or therap$ or change)) or (patient$ adj5 educat$) or (counselling or counseling) or (psycho-educat$ or psychoeducat$) or (motivat$ adj5 (intervention or interv$)) or (health adj5 educat$) or (psychosocial or psycho-social) or (cognitive adj2 behav$)).mp. | 994524 |
| 26 | or/21-25 | 2280801 |
| 27 | 3 and 7 and 20 and 26 | 118 |

## CINAHL EBSCOhost (date of last search: August 31, 2021)

| **No.** | **Searches** | **Results** |
| --- | --- | --- |
| **Part 1: Children and adolescents** | | |
| S1 | (MH “Child+”) OR (MH “Adolescent”) OR (MH “Pediatrics”) | 693663 |
| S2 | child* OR adolescen* OR p#ediatric* OR teen* OR preteen* OR pre-teen* OR youth* OR pubescen* OR juvenil* OR boy* OR girl* OR minor# OR kid# OR underage# OR under age# | 1507585 |
| S3 | S1 OR S2 | 1509730 |
| **Part 2: Congenital heart disease** | | |
| S4 | (MH “Heart Defects, Congenital+”) | 27741 |
| S5 | ((heart OR cardiac) N2 (defect* OR abnormal* OR anomal* OR malform*)) OR (congenital N2 (heart OR cardiac OR cardio* OR defect*)) | 46251 |
| S6 | (aort* N2 coarctation) OR (septal N2 defect*) OR (septum N2 defect*) OR (patent next ductus next arteriosus) OR (transposition N2 arteries) OR (transposition N2 vessels) OR guch OR (fallot* N2 tetralogy) | 10059 |
| S7 | S4 OR S5 OR S6 | 56538 |
| **Part 3: Digital health** | | |
| S8 | (MH “Cellular Phone+”) OR (MH “Cell Phone”) OR (MH “Computers, Hand-held”) OR (MH “Telemedicine”) OR (MH “Telenursing”) OR (MH “Email”) OR (MH “Mobile Applications”) OR (MH “Medical Informatics”) OR (MH “Nursing Informatics”) OR (MH “Social Media”) | 62367 |
| S9 | (cell* OR mobile*) N1 (phone* OR telephone* OR technolog* OR device*) | 55107 |
| S10 | smartphone# OR smart phone# OR smart-phone# OR cellphone# OR mobiles | 39646 |
| S11 | (personal N1 digital) OR (PDA N3 (computer* OR device* OR assistant*)) OR (tablet* N3 (device* OR computer*)) OR (hand* N1 computer*) OR palmtop OR palm PC | 6238 |
| S12 | (windows N3 (mobile* OR phone*)) OR android OR ipad* OR i-pad* OR iphone* OR i-phone* | 4644 |
| S13 | mhealth OR m-health OR "mobile health" OR ehealth OR e-health OR "electronic health" | 59303 |
| S14 | telemedicine OR tele-medicine OR telehealth OR tele-health OR telecare OR tele-care OR telenursing OR tele-nursing OR telemonitor* OR tele-monitor* OR teleconsult* OR tele-consult* OR telecounsel* OR tele-counsel* OR telecoach* OR tele-coach* | 30842 |
| S15 | ((text* OR short OR voice OR multimedia OR multi-media OR electronic OR instant) N1 messag*) OR instant messenger | 13310 |
| S16 | texting OR texted OR texter* OR ((sms OR mms) N1 (service* OR messag*)) OR (remind* N3 (text* OR system* OR messag*)) OR interactive voice response* OR IVR OR voice call* OR callback* OR voice over internet OR VOIP | 8586 |
| S17 | electronic mail* OR email* OR e-mail OR webmail | 76216 |
| S18 | "mobile app#" OR Facebook OR Twitter OR Whatsapp* OR Skyp* OR YouTube OR "You Tube" OR Google Hangout* OR Wechat* OR "Wei Xin" OR (social N (media OR network*)) | 18601 |
| S19 | (medical OR clinical OR health OR healthcare OR nurs*) N3 informatics | 79937 |
| S20 | S8 OR S9 OR S10 OR S11 OR S12 OR S13 OR S14 OR S15 OR S16 OR S17 OR S18 OR S19 | 307926 |
| **Part 4: Exercise-based cardiac rehabilitation** | | |
| S21 | (MH “Rehabilitation+”) OR (MH “Telerehabilitation”) OR (MH “Exercise”) OR (MH “Recreational Therapy”) OR (MH “Recreation+”) | 370781 |
| S22 | (MH “[Exertion](https://web.b.ebscohost.com/ehost/mesh/tree?term=Exertion&sid=11ab789b-b253-4ea0-94d6-0b4ed3d5d16f%40sessionmgr102&vid=109)+”) OR (MH “Physical Fitness+”) OR (MH “Psychotherapy+”) OR (MH “Self Care”) OR (MH “Counseling”) OR (MH “Health Education”) OR (MH “Patient Education”) OR (MH “Physical Education and Training”) | 444030 |
| S23 | rehabilitat* OR telerehabilitat* OR tele-rehabilitat* OR (train* N5 (strength* OR aerobic* OR exercise*)) OR ((exercise* OR fitness) N3 (treatment OR intervent* OR program*)) OR recreation* | 401467 |
| S24 | (physical* N5 (fit* OR train* OR therap* OR activit*)) OR kinesiotherap* OR psychotherap* OR (psycholog* N5 intervent*) | 334683 |
| S25 | (self N5 (manag* OR care OR motivate*)) OR ((lifestyle OR life-style) N5 (interven* OR program* OR treatment*)) OR ((behavior* OR behaviour*) N5 (modify OR modificat* OR therap* OR change)) OR (patient* N5 educat*) OR (counselling OR counseling) OR (psycho-educat* OR psychoeducat*) OR (motivat* N5 (intervention OR interv*)) OR (health N5 educat*) OR (psychosocial OR psycho-social) OR (cognitive N2 behav*) | 1118296 |
| S26 | S21 OR S22 OR S23 OR S24 OR S25 | 1727327 |
| S27 | S3 AND S7 AND S20 AND S26 | 618 |

# Supplementary File 2. Study selection criteria

|  | **Inclusion criteria** | **Exclusion criteria** |
| --- | --- | --- |
| **Population:** | Children and adolescents with CHD aged 5 to 18 years | Children and adolescents with CHD aged 5 to 18 years were not reported separately. |
| **Concept:** | (1) Studies describing or reporting the design, development, usability or feasibility of digital health interventions for children and adolescents with CHD and/or their families to promote cardiac fitness.  (2) Studies evaluating the effectiveness of various types of digital health interventions for children and adolescents with CHD and/or their families, and the characteristics and contexts contributing to positive clinical and patient outcomes or experiences.  (3) Studies reporting the facilitators and barriers of integrating digital health into practice in the field of pediatric cardiac rehabilitation. | (1) Studies validating electronic versions of scales or questionnaires of existing instruments or electronic patient records.  (2) Studies reporting costs of the digital health interventions only.  (3) Studies on digital health interventions being used for diagnostics/imaging. |
| **Context:** | Studies conducted in a variety of settings such as clinic-based, community-based, home settings, or a combination of these. | Studies conducted in screening and diagnostic settings. |
| **Others** | Peer-reviewed quantitative/qualitative/mixed methods empirical studies or descriptions of study protocols. | Editorials, opinion/perspective papers, conference abstracts, case reports, theses/dissertations. |

# Supplementary File 3. Study characteristics and main findings of included studies

| **Author, year (country)** | **Aim & Design** | **Participants** | **Outcomes** | **Main findings** | **Strengths & weaknesses** |
| --- | --- | --- | --- | --- | --- |
| Klausen, et al. 2016  (Denmark) | **Aim:**  To assess benefits and harms of adding an eHealth intervention to health education and individual counseling in adolescents with congenital heart disease.  **Design:**  A nationwide, parallel group, randomized clinical trial. | **Sample:**   - 158 participants (66 females)   Intervention group n = 81  Control group n = 77   - Mean age: 14.6 ± 1.3 - CHD diagnosis: coarctation of the aorta, transposition of the great arteries, steno-fallot tetralogy, double outlet right ventricle, truncus arteriosus, total cavopulmonary connection surgery, atrioventricular septal defect, and others. - Participant recruitment: 2010.05-2013.05   **Setting:**  Patients were identified from the Danish National Register of Patients. | **Adherence to the program:**   - Numbers of log-ins and use of applications (time, type, frequency, and intensity of registered physical activities). - System failures and changes made to the Web site are accounted for and type of assistance offered to sign-up procedure is recorded.   **Anthropometric data:**   - Height, weight, waist circumference, hip circumference, body surface, skinfold thickness, body fat percentage, and blood pressure. - Hand-grip strength (North Coast Hydraulic Dynamometer). - A spirometric measurement by SpiroUSB (Intramedic, Gentofte, Denmark).   **Primary outcomes** (measured at baseline and 12-month):   - Peak oxygen uptake assessed by an incremental cardiorespiratory exercise test.   **Secondary outcomes** (measured at baseline and 12-month):   - Physical activity assessed using the omni-directional GTIM Accelerometer. - Self-rated physical activity assessed by an electronic questionnaire related to time, frequency, and intensity of physical activity as well as sedentary activities. - Self-efficacy related to exercise   **Exploratory outcomes** (measured at baseline and 12-month):   - Generic quality of life (PedsQL 4.0 generic module) - Disease-specific quality of life (PedsQL 3.0 cardiac module)   **Mortality and morbidity outcomes**:   - Follow up after 2 years. - Follow up after 10 years. | (1) In the intervention group, 58 patients (72%) completed the final test, but of those, only 46 (57%) fulfilled the compliance criteria of using the eHealth application for at least 2 consecutive weeks. Only 8 (10%) patients were active users during the last week of the intervention. In the control group, 61 patients (79%) completed both exercise tests.  (2) At 1 year, the mean VO2 peak was 43.2± 9.7 ml·kg−1·min−1 in the intervention group and 46.3±10.1 ml·kg−1·min−1 in the control group. The difference in mean VO2 peak between groups of −0.41 (95% CI −2.45 to 1.63) included zero and excluded relevant difference.  (3) Patients in the intervention group spent a mean of 40.3 ± 21.8 minutes per day in moderate to vigorous physical activity compared to 41.3 ± 22.9 minutes per day in the control group. The between group difference of −0.04 min day (95% CI−2.23 to 0.23) was not significantly different. Assessments of physical activity by questionnaires yielded similar results.  (4) Differences in generic (0.32 points; 95% CI −2.39 to 3.14) and disease-specific health-related quality (−0.72 points; 95% CI −3.73 to 2.89) of life between the intervention and the control group were not significantly different. | **Strengths:**   - Included adolescents with no limitations to physical activity across multiple diagnoses. - Larger than comparable home-based trials. - The fraction of eligible patients who enrolled was higher (58%) than in similar trials (29–36%). - Prospectively registered and only minor deviations from the pre-specified methodology. - The PreVaiL trial strives to show long-term effects of any type of activity encouragement. - Patients were stratified according to gender and high or low VO2 peak.   **Weaknesses:**   - Only 119 (75%) patients completed the trial, while the necessary sample size to detect a clinically relevant difference of 3.00 ml·kg−1·min−1 would be 160 patients. - Selection of reported results. - It was possible to use the application despite no registration of points. - The blinding of outcome assessors cannot be fully ensured in behavioral interventions. |
| Lemire, et al. 2020  (Canada) | **Aim:**  To describe the design and rationale of a prospective, cluster-randomized controlled trial evaluating the feasibility and impact of a tool kit of resources for providing outpatient physical activity counselling for children with CHD.  **Design:**  A protocol of a cluster randomized controlled trial. | **Sample:**   - The study will enroll 200 children aged 5 to 17 previously diagnosed with moderate to severe CHD. - CHD diagnosis: moderate or severe in complexity defined by the American Cardiology/American Heart Association joint guidelines. - Participant recruitment: N/A   **Setting:**  All eligible patients at small (London, ON), medium (Ottawa, ON) and large (Edmonton, AB) pediatric cardiac clinics will be approached. | **Adherence to the program**:   - Numbers of log-ins and use of applications (time, type, frequency, and intensity of registered physical activities). - System failures and changes made to the Web site are accounted for and type of assistance offered to sign-up procedure is recorded.   **Primary outcomes** (measured at baseline and 6-month):   - Daily physical activity as measured by pedometer step counts and minutes of moderate or vigorous intensity activity as measured by the uniaxial PiezoRX pedometer.   **Secondary outcomes** (measured at baseline and 6-month):   - Quality of life assessed using the PedsQL 4.0 core module. - The child’s capacity for a physically active lifestyle assessed using the Physical Literacy Screening task. - Activity motivation and confidence assessed using the Children's Self-Perceptions of Adequacy in and Predilection for Physical Activity   **Health system impacts** (extracted from the electronic health record system at 6-month):   - Clinic visit time - Number of physical activity encounters documented - The proportion of patients in the intervention group of the physical activity counselling intervention as a clinical practice. - The proportion of patients requiring advanced physical activity counselling from a kinesiologist. | N/A | **Strengths:**   - The cluster-randomization by site*week in cardiac clinics prevents two patients in the same waiting room being allocated to different study groups and facilitates scheduling of the clinicians who will deliver the study intervention and allays clinician concerns about withholding physical activity information from patients who can see physical activity posters in the clinic and other patients with new resources. - Pedometer step counts will be recorded daily for one week/ month, minimizing reactivity.   **Weaknesses:**   - Parents and cardiac clinic personnel will be aware of the study group allocation as blinding is not feasible. - Consistency of the study assessments and intervention delivery between participating study sites. |
| Meyer, et al. 2018  (Germany) | **Aim:**  To improve health-related physical fitness (primary outcome) and health-related quality of life (HRQoL) with a web-based motor intervention program in pediatric patients with CHD and to understand feasibility and compliance of web-based studies.  **Design:**  A prospective, single-center, parallel group, randomized controlled trial. | **Sample:**   - 70 participants (24 females)   Intervention group n = 35  Control group n = 35   - Mean age: 13.05 ± 2.6 - CHD diagnosis: CHD of moderate and complex severity according to the American College of Cardiology. - Participant recruitment: 2018.05-2019.09   **Setting:**  The trial was performed out of the outpatient clinic of the German Heart Center Munich, Munich, Germany. | **Primary outcomes** (measured at baseline and 6-month):   - An improvement of health-related physical fitness assessed as the mean z-score of the five different tests of the FITNESSGRAM test battery including Curl-Up, Push-Ups, Shoulder Stretch, Sit and Reach, and Trunk Lift in standardized order.   **Secondary outcomes** (measured at baseline and 6-month):   - Compliance (adherence) with the supervised web- and home-based intervention measured as participation rate in the training sessions (%). - Improvement of Central/peripheral blood pressure. - Improvement of Intima-media thickness. - Improvement of health-related quality of life assessed by KINDL, a generic instrument commonly used to assess HRQoL. - Improvement of pulse wave velocity. | (1) Per-protocol analysis revealed no improvement after 24-week web-based exercise training for total health-related physical fitness (intervention group: 0.14 ± 0.38 vs control group: 0.09 ± 0.38, *P* = 0.560) or any of the 5 subcategories of physical fitness.  (2) There was also no improvement in total HRQoL after 24-weeks web-based exercise intervention (intervention group: -1.73 ± 8.33, control group: 1.31 ± 7.85, *P* = 0.160).  (3) The intention-to-treat analysis revealed no significant differences between intervention and control group in total physical fitness (-0.04 ± 0.08 SEE, *P* = 0.625), total HRQoL (2.58 ± 1.90 SEE, *P* = 0.180), or any of the subcategories.  (4) In total, 61 patients completed the follow-up (87.1%). The mean weekly exercise adherence was 33% (IQR 8%-60%). There was no significant association between adherence rate and difference of HRPF (r = 0.05, *P* = 0.800). | **Strengths:**   - The combination of home-based exercise interventions with modern eHealth approaches to support patients. - Include a variety of participants independent of their previous physical background. - The study kept training days, location, and execution flexible.   **Weaknesses:**   - The study was planned as a randomized control trial with a crossover design, but only presented the first half procedures and results. - Selection of reported results. |
| Rombeek, et al. 2017 (Canada) | **Aim:**  To examine the feasibility and impact of a 1-year, structured lifestyle intervention program in overweight and obese CHD children and adolescents (BMI for age > 85% WHO Growth Charts for Canada) using smartphones.  **Design:**  A pilot and feasibility study utilizing a single-arm, prospective design. | **Sample:**   - 34 participants (15 females)   Operated group n = 15  Non-operated group n = 19   - Mean age: 14.3 ± 2.8 - CHD diagnosis: heart defects of mild and modest complexity, including atrial, ventricular, and atrio-ventricular septal defects, Tetralogy of Fallot, and coarctation of the aorta. - Participant recruitment: 2012.05-2015.10   **Setting:**  Eligible candidates are selected during patient visits and through chart review by a network of cardiologists at the London Health Sciences Centre (LHSC). | **Feasibility outcomes:**   - Integrity of the study protocol, data collection, and questionnaires - Recruitment and consent - Intervention acceptability (participation levels, compliance, and retention)   **Primary outcomes** (measured at baseline, 6-month, and 12-month):   - Anthropometry (body weight, height, waist and hip circumference) - Body composition (body fat, lean body mass) - Cardiorespiratory exercise capacity (maximal volume oxygen uptake)   **Secondary outcomes** (measured at baseline, 6-month, and 12-month):   - Nutrition and physical activity behaviour (3-day food records and omni-directional accelerometer) - Quality of life (PedsQL 4.0) - Lung and muscle function - Cardio-metabolic risk markers   **Participant feedback:**   - Program evaluation ratings - Comments on participant experience | (1) This pilot study had a high retention rate (100%), a low attrition rate (2%), and demonstrated the feasibility to perform a larger controlled study on remote lifestyle intervention in children with CHD and overweight or obesity.  (2) There was a significant linear decrease in BMI z-score, waist circumference, waist circumference z-score, and waist to height ratio z-score over 12 months in the operated group. There was a small, but significant, increase in the BMI over 12 months in the non-operated group.  (3) A significant linear increase in lean body mass over the 12-month period was observed for both the operated and non-operated groups.  (4) There was no significant difference between cardio-metabolic outcomes and maximal volume oxygen uptake at baseline, 6 months, or 12 months for both groups.  (5) From the participants’ perspective, there was a high level of satisfaction with the intervention and staff interactions as well as a low perceived burden of participation. There were also specific concerns, including mixed impressions regarding technology usage and a less impressive indication of actual impactful behavior change. | **Strengths:**   - Dietary and fitness components were designed to be realistic, sustainable, and empowering for young people living in an uncontrolled environment. - Intervention effects at 6-month and 12-month were shown.   **Weaknesses:**   - Retrospectively registered. - Selection of reported results. - A single-arm study. |

# Supplementary File 4. Key conceptual information regarding the digital health tools

| **Author, year (country)** | **Digital health tool** | **Feature highlights** | **Design & development** | **Usability & feasibility** | **BCTs** | **User experience** | **Facilitators and barriers**  **to digital health adoption** |
| --- | --- | --- | --- | --- | --- | --- | --- |
| Klausen, et al. 2016  (Denmark) | *MinPuls.nu* software tool and a personal home page (http://www.minpuls.nu/). | - Providing health education information. - Sending a new tailored interactive text encouragement every week. - A personal exercise-planning and monitoring tool (Participants used to record exercise duration and type, plan and register all other activities during the day. The app translated intensity into virtual points to provide motivation. The patients could monitor their results on a personal website, with a goal of achieving a bronze, silver, or gold level of points on a weekly basis). | A private software deliverer is responsible for the portal and has developed the software tool called *MinPuls.nu*, in collaboration with the coordinating investigator and a group of stakeholders. | Usability:  NR  Feasibility:  75.3% (119/158) completed the final assessment; but in the intervention group, only 57% fulfilled the compliance criteria of using the tool for ≥ 2 consecutive weeks. | - Action planning - Rewards for successful behavior - Self-monitoring of behavior - Performance feedback - Demonstration of selected behaviors delivered as short videos via the mobile phone | NR | **Facilitators:**   - Interventions using eHealth are low cost. - The use of an existing and widely used eHealth platform, Mobile Fitness A/S Copenhagen, Denmark. - The consideration of Behavior change techniques.   **Barriers:**   - No more than 57% of the participants used the application at any one point in time. - Lack of consideration regarding system security and privacy. |
| Lemire, et al. 2020  (Canada) | Web-based platform CHEO (www.cheoactive.ca) | - A unique log-in account. - Providing simple, low-cost activity ideas and suggestions as well as progressions for improving movement skills or physical fitness. - Activities available to the child will be aligned with the child’s physical activity restrictions entered into their web site account. - Kinesiology support will be provided remotely using electronic resources if necessary. | The physical activity tool kit resources were developed collaboratively with patients, families and clinicians, confirming suitability for clinic use and high patient priority. | Usability:  NR  Feasibility:  NR | NR | NR | **Facilitators:**   - Low resource cost of providing the individualized physical activity interventions. - The innovative, personalized, and user-friendly nature of the online tool kit resource for patients and their families.   **Barriers:**  NR |
| Meyer, et al. 2018  (Germany) | Web-based e-Learning platform Einstein (https://einstein.costner.is) | - Providing exercise training video clips and serving as a virtual training partner. - Electronic reporting and the possibility of tracking. - Automated messages can be sent to the patients to remind him/her of the execution and vice versa the supervisor when a training progress is missing. | NR | Usability:  NR  Feasibility:  87.1% (61/70) patients completed the follow-up. The mean weekly exercise adherence was 33%. | - Monitoring of behavior - Demonstration of behaviors delivered as short videos via the mobile phone - Behaviors reminder | NR | **Facilitators:**   - The videos served as a virtual training partner and exercise was performed simultaneously while watching the video. - The use of a web-based solution could include more patients in particular from remote areas and deliver and monitor the intervention more effectively. - Automatically recorded adherence and reminding messages. - eHealth provides easy and wide reachability by low cost.   **Barriers:**   - The standardized training protocol was not individual enough. - Insufficient exercise intensity. - Requiring more guidance or external supervision. - The flexible approach might have led to laziness and carelessness. - Time competition with existing leisure activities. |
| Rombeek, et al. 2017 (Canada) | “Smart Heart” web-based application | - Activity and nutrition behaviors tracking/ Self-monitoring - Goal setting - Accessing nutrition and physical activity resources - Facilitating communication between participants and their health coaches | NR | Usability:  NR  Feasibility:  This Smart Heart study had a high retention rate (100%), a low attrition rate (2%); but majority of respondents did not find the web-based app to be a useful tool (54 %) and a large proportion did not use it at all (28%). | - Self-monitoring - Goal-setting - Action plan | There was a high level of satisfaction with the intervention and staff interactions as well as a low perceived burden of participation, but there were also specific concerns, including mixed impressions regarding technology usage and a less impressive indication of actual impactful behavior change. | **Facilitators:**   - The use of smart phones in the study enabled to effectively engage with the participants, despite geographic or scheduling limitations. - Cost-effective.   **Barriers:**   - The development of the online software required significantly more time than was originally planned, due, in part, to privacy reviews requested by the institutional REB. - Web application needs improvement. - The web application was poorly implemented. - The web app lacks of personalization. |

# Supplementary File 5. Description of interventions and research gaps

| **Author, year (country)** | **Description of interventions** | **Research gaps** |
| --- | --- | --- |
| Klausen, et al. 2016  (Denmark) | **The Paediatric Rehabilitation for Vanguard in Lifeskills (PReVaiL):**   - All patients received 45 min of group health education and 15 min of individual counseling with their parents. The goal of the health education was to stimulate sources of self-efficacy before baseline tests. The curriculum covered physical activity, smoking, alcohol, diet, and sleep. In the group setting, patients shared experiences with physical activity and other incidental experiences. The individual coaching was intended to reinforce patients' perceived competence after baseline tests and action planning based on health education and personal preferences. - Behavior change techniques applied included the following: (1) information on benefits of physical activity, (2) goal setting, (3) action planning, (4) barrier identification and problem solving, (5) setting of graded tasks, (6) environmental structuring, (7) facilitation of social comparison, (8) time management, and (9) stimulation of future rewards.   **Digital health intervention component:**   - The experimental intervention consisted of a 52-week Internet, mobile application, and SMS-based program delivering individually tailored text messages to encourage physical activity. The program encompassed three main approaches: health education, tailored interactive text encouragements, and a personal exercise planning tool. Text messages encouraged short-term activities with at least 10 min of high intensity as often as possible throughout the day. - The patients allocated to the eHealth intervention were sent health information and a new encouragement every week. Patients recorded exercise duration and type in a mobile application that translated intensity into virtual points, a system designed to provide motivation. The mobile application could also be used to plan and register all other activities during the day. The patients could monitor their results on a personal website, with a goal of achieving a bronze, silver, or gold level of points on a weekly basis. - The intervention did not allow for interaction between patients due to concerns regarding safeguarding minors on the Internet.   **Setting:**  Home/internet delivery  **Supervision:**  Unsupervised but self-reported adherence using an app. | - Lack of caregiver/family involvement in the intervention - Lack of staff commitment and communication - The intervention was tailored according to participants’ responses to the question “how do you assess your fitness”, instead of objectively assessed baseline VO2 status. |
| Lemire, et al. 2020  (Canada) | **The physical activity counselling intervention:**   - Children randomized to the control arm will receive usual care. Individuals in the control arm will not be deprived of any information that would normally be available regarding physical activity, and if they raise questions about physical activity, they will receive answers and information based on standard clinic practice without the use of the study intervention tool kit of resources. These participants will be provided with access to the intervention resources only after they have completed their study participation. - The physical activity counselling intervention will consist of four primary components. First, posters emphasizing the importance of and recommendations for childhood physical activity, and encouraging parent and family questions about the child’s physical activity will be displayed in clinic rooms. Second, clinicians will complete the physical activity tool kit resources as appropriate for each child. At a minimum this will include recommended daily time for physical activity, importance of reducing screen time, health benefits of outdoor time, the limited level of activity associated with some organized sport and school physical education classes, and specific information on what activities the child is able to do given the required physical activity restrictions (if any). Third, children and parents will be introduced to the physical activity and CHD web site (www.cheoactive.ca) and a unique log-in account will be created. The web site provides simple, low-cost activity ideas and suggestions as well as progressions for improving movement skills or physical fitness. Activities available to the child will be aligned with the child’s physical activity restrictions entered into their web site account. Fourth, a discussion of physical activity questions will encourage children and parents to raise their issues or concerns regarding the child’s participation, and clinic staff can use additional tool kit resources to answer these questions. - Additional support from a Registered Kinesiologist will be provided if the professional delivering the intervention feels it is warranted, or if the parents or patient with CHD have additional questions or request individualized support during the clinic intervention. - Kinesiology support will also be provided to intervention participants who have average daily pedometer step counts below the recommended level of 12,000 steps per day. If required, kinesiology support will be provided remotely using electronic resources, ensuring all activity support is provided by the same Registered Kinesiologist (JY) and is available regardless of where the child/parents live or which clinic they attend.   **Digital health intervention component:**   - Children and parents will be introduced to the physical activity and CHD web site (www.cheoactive.ca) and a unique log-in account will be created. The web site provides simple, low-cost activity ideas and suggestions as well as progressions for improving movement skills or physical fitness. Activities available to the child will be aligned with the child’s physical activity restrictions entered into their web site account. - Kinesiology support will be provided remotely using electronic resources if necessary.   **Setting:**  Clinic/internet delivery  **Supervision:**  Unsupervised but automatically recorded adherence by a pedometer | N/A |
| Meyer, et al. 2018  (Germany) | **E-Health exercise/motor intervention:**   - The control group was instructed to go about their daily routine as usual. - Patients assigned to the intervention group started with an exercise intervention. The motto of the exercise/motor intervention is “One Hour a Week, Brings Mobility, Power and Speed” which refers to the weekly training volume of 60 min. - These 60 min are separated into 3 weekly sessions of 20 min each. The intervention is set up for 6 months, resulting in a total of 72 exercise sessions (3 sessions per week over 24 weeks) for each participant. Each session comprises 20 child-oriented exercises with the focus to increase strength and flexibility. Exercises are executed for 30 s followed by a recovery period of 30 s. Each session starts with 3–4 warming-up exercises, followed by 10–12 strength and flexibility exercises, and ending with 3–4 cool down or stretching tasks. - To enhance adherence, each participant received a weekly email reminder to stick with the training. In case there was no training progress for more than 2 weeks, participants were called to inquire about the causes. Furthermore, telephone calls between researcher and participants provided further subjective feedback about any problems with the program.   **Digital health intervention component:**   - All exercise sessions are continuous video clips transmitted to the participants via the web-based e-Learning platform Einstein (https://einstein.costner.is). The participant simply has to imitate the execution and follow some short advices. Each exercise session included a video with child-friendly instructions and demonstration of the different exercises. The videos served as a virtual training partner and exercise was performed simultaneously while watching the video. - For a better orientation, a timer in the upper right corner displays the duration of exercise and the time of recovery. Beep signals indicate the last 3 s of the exercise and recovery period. - After each session, the screen will jump to a short online survey. Participant will give a quick report on perceived exertion (Borg scale) and feasibility of the actual session. The investigator can thereby monitor adherence rate and, in case of lacking compliance, intervene via email or telephone calls. - The three video clips will be available for 1 week (Monday to Sunday) and the participant is free to choose when to train. At the end of a week all sessions will be erased from the account and replaced by new 3 sessions. That procedure will be repeated over the target 6 months.   **Setting:**  Home/internet delivery  **Supervision:**  Unsupervised but automatically recorded adherence by a video tracking tool included in the exercise platform | (1) The intervention modality and intensity have led to a training volume or intensity insufficient to achieve any effect at all.  (2) The standardized training protocol was not individual enough.  (3) Time competition with existing leisure activities.  (4) Despite the tracking function of all video activities, there was no additional movement monitoring or other verification of exercise load during the 24-week intervention period.  (5) It cannot entirely rule out that the patients cheat in reporting.  (6) The specificity/focus of the exercise selection/intervention may not have been optimum |
| Rombeek, et al. 2017 (Canada) | **“Smart Heart” lifestyle counselling intervention:**   - The structured lifestyle intervention involves alternating weekly phone calls with two health coaches: a registered dietitian and a fitness specialist. A total of 50 phone calls (25 nutrition-related and 25 physical activity-related) are delivered over the one-year study. Phone counseling sessions are up to 30 min in duration. - When appropriate, weekly counseling sessions are supplemented with relevant resources that are provided to patients via email or regular mail. - After 6 months in the program, participants are introduced to supporting program-specific software that they can access online, as an additional way to interact with the program, set goals, and record their progress.   **Digital health intervention component:**   - A program-specific software based on a home computer or mobile device to (1) provide participants with optional email addresses connecting children and youth directly with their health coaches, (2) provide a platform for accessing nutrition and physical activity resources by all family members, and (3) in the latter half of the program, provide access to a tracking (self-monitoring) and goal-setting application for participants. - Participants are provided with in-person instruction on the software and are reminded to use the software through text messages and during counseling sessions. Participants log in to the web-based application daily to record activity and nutrition behaviors and to set goals for the following day. Health coaches have administrative access to the application in order to follow and comment on each participant’s progress. - The data collected on the web-server is used primarily to inform health coaches in their practice. Data are also used for evaluating the web application (patterns of use) and defining participant engagement in the program. - Privacy and confidentiality: only non-identifying numerical data are collected and stored in a secure SQL DB format. User authentication is required and generic logins using alpha-numeric study ID’s are provided to each participant in order for researchers to make sense of the data collected.   **Setting:**  Home/internet delivery  **Supervision:**  Unsupervised but self-reported activity and nutrition behaviors using an app. | - Lack of caregiver/family involvement in the intervention - Lack of communicating study results back to the participants - Lack of staff commitment and communication - Lack of theoretic framework - Lack of individually tailored nutrition or physical activity recommendations. - Web application not used or not a priority for use (Participants are introduced to the app after 6 months in the program). |

# References:

**(1) Klausen, et al. 2016 (Denmark)**

Klausen, S. H., Andersen, L. L., Søndergaard, L., Jakobsen, J. C., Zoffmann, V., Dideriksen, K., ... Wetterslev, J. (2016). Effects of eHealth physical activity encouragement in adolescents with complex congenital heart disease: the PReVaiL randomized clinical trial. *International Journal of Cardiology*, 221, 1100‐1106. doi: 10.1016/j.ijcard.2016.07.092

Klausen, S. H. (2010). NCT01189981: Effect of eHealth encouragements to intensive exercise in adolescents with congenital heart disease. https://clinicaltrials.gov/show/NCT01189981. Retrieved from <https://www.cochranelibrary.com/central/doi/10.1002/central/CN-02026201/full>

Klausen, S. H., Mikkelsen, U. R., Hirth, A., Wetterslev, J., Kjaergaard, H., Sondergaard, L., & Andersen, L. L. (2012). Design and rationale for the PREVAIL study: effect of e-Health individually tailored encouragements to physical exercise on aerobic fitness among adolescents with congenital heart disease - A randomized clinical trial. *American Heart Journal*, 163(4), 549‐556. doi: 10.1016/j.ahj.2012.01.021

**(2) Lemire, et al. 2020 (Canada)**

Lemire, O., Yaraskavitch, J., Lougheed, J., Mackie, A. S., Norozi, K., & Longmuir, P. E. (2020). Impacting child health outcomes in congenital heart disease: cluster randomized controlled trial protocol of in-clinic physical activity counselling. *Contemporary clinical trials*, 105994. doi: 10.1016/j.cct.2020.105994

Longmuir, P. (2018). NCT03435354: Enhanced physical activity support in congenital heart disease clinical care (PAToolKit). https://clinicaltrials.gov/show/NCT03435354. Retrieved from https://www.cochranelibrary.com/central/doi/10.1002/central/CN-01523036/full

**(3) Meyer, et al. 2018 (Germany)**

Meyer, M., Hreinsdottir, A., Hacker, A. L., Brudy, L., Oberhoffer, R., Ewert, P., & Muller, J. (2018). Web-based motor intervention to increase health-related physical fitness in children with congenital heart disease: A study protocol. *Frontiers in Pediatrics*, 6, 224. doi: 10.3389/fped.2018.00224

Muenchen, D. H. (2018). NCT03488797: Web-based motor intervention to increase health related physical fitness in children with congenital heart disease. https://clinicaltrials.gov/show/NCT03488797. Retrieved from https://www.cochranelibrary.com/central/doi/10.1002/central/CN-01567824/full\

Meyer, M., Brudy, L., Fuertes-Moure, A., Hager, A., Oberhoffer-Fritz, R., Ewert, P., & Muller, J. (2021). E-Health exercise intervention for pediatric patients with congenital heart disease: A randomized controlled trial. *Journal of Pediatrics*, 233:163-168. doi: 10.1016/j.jpeds.2021.01.058

**(4) Rombeek, et al. 2017 (Canada)**

Rombeek, M., De Jesus, S., Altamirano-Diaz, L., Welisch, E., Prapavessis, H., Seabrook, J. A., & Norozi, K. (2017). The use of smartphones to influence lifestyle changes in overweight and obese youth with congenital heart disease: a single-arm study: Pilot and feasibility study protocol: Smart Heart Trial. *Pilot & Feasibility Studies*, 3, 59. doi: 10.1186/s40814-017-0207-y

Rombeek, M. (2016). Smart Heart Trial: structured lifestyle intervention for overweight and obese youth with operated heart defects. https://clinicaltrials.gov/show/NCT02980393. Retrieved from https://www.cochranelibrary.com/central/doi/10.1002/central/CN-01560347/full

Altamirano-Diaz, L., Rombeek, M., De Jesus, S., Welisch, E., Prapavessis, H., Dempsey, A. A., ... Norozi, K. (2017). Remote lifestyle counseling influences cardiovascular health outcomes in youth with overweight or obesity and congenital heart disease. *Frontiers in Pediatrics*, 5, 269. doi: 10.3389/fped.2017.00269

Eagleson, R., Altamirano-Diaz, L., McInnis, A., Welisch, E., De Jesus, S., Prapavessis, H., ... Norozi, K. (2017). Implementation of clinical research trials using web-based and mobile devices: challenges and solutions. *BMC Medical Research Methodology*, 17, 1-8. doi:10.1186/s12874-017-0324-6

Rombeek, M., De Jesus, S., Prapavessis, H., Dempsey, A. A., Fraser, D., Welisch, E., ... Norozi, K. (2020). Improving remote lifestyle intervention studies in children: Participant and caregiver feedback of the smart heart study. *Patient Education & Counseling*, 103(7), 1326-1334. doi: 10.1016/j.pec.2020.02.016
